# Supplementary material
Source: publisher site journal article supplement (https://www.spandidos-publications.com/7881/downloadSupplementary)
Supplement: Supplementary file 1 [file downloadSupplementary]

## Sheet: Sheet1
Table II. Lentiviral transfection short hairpin RNA sequences.
shRNA	DNA (5'-3')	RNA (5'-3')a
sh-NC	5'-CAACAAGATGAAGAGCACCAA-3'	5'-CAACAAGAUGAAGAGCACCAA-3'
sh1	5'-GGATGAGTTTGAGGACAGGGT-3'	5'-GGAUGAGUUUGAGGACAGGGU-3'
sh2	5'-GATGACTGGCCAGCAAGGAAT-3'	5'-GAUGACUGGCCAGCAAGGAAU-3'
sh3	5'-GCCAAACAACGCCTATGTGCA-3'	5'-GCCAAACAACGCCUAUGUGCA-3'
aThe RNA sequence is the derivative of the target DNA sequence of the shRNA. sh-NC, scrambled negative control short hairpin RNA.
